# Supplementary material
Source: publisher figshare collection journal article supplement (https://wiley.figshare.com/articles/dataset/_/3557520)
Supplement: Supplementary file 2 [file 1 › appendix-B.htm]

Ecological Archives E094-199-A2


*Ecological Archives* E094-199-A2

Jason Bertram, Roderick C. Dewar. 2013. Statistical patterns in tropical tree cover explained by the different water demand of individual trees and grasses. *Ecology* 94:2138–2144. http://dx.doi.org/10.1890/13-0379.1

Appendix B. Processing of remote-sensing data.

> View / download PDF.


---

[Back to E094-199]
